# Supplementary material
Source: publisher site journal article supplement (https://www.spandidos-publications.com/8155/downloadSupplementary)
Supplement: Supplementary file 1 [file downloadSupplementary]

Table SI. Primer sets related to the experimental procedures: Reverse transcription-quantitative PCR primers for gene expression quantification.

| Gene    | Primer       | Sequence (5'-3')       |
|---------|--------------|------------------------|
| GAPDH   | Forward      | GGTCGGAGTCAACGGATTTG   |
|         | Reverse      | GGAAGATGGTGATGGGATTTC  |
| Pum2    | Forward      | ATTGATGAGGTCTGCTGTC    |
|         | Reverse      | GCGAAGAGTAGTGATGTGA    |
| Adm     | Forward      | CTTGCCCGCTCATAAACT     |
|         | Reverse      | ACCTCTTGACATCAACAAAC   |
| Plpp3   | Forward      | GAAATAACTGCGACTAGAGG   |
|         | Reverse      | TGTATGCCACAGAAGTGTT    |
| Itga8   | Forward      | ATCTGCTCATTTCCTGTG     |
|         | Reverse      | CTGACTCTTGTGACCCATT    |
| Itga11  | Forward      | CAGAGGCAGATAGGCATC     |
|         | Reverse      | CAACAAAGGGTTAAGGCATA   |
| Ndr4    | Forward      | AGAGAAGACAACCATCAATG   |
|         | Reverse      | CCTTACTGTAGATAGCACTTC  |
| Rgs2    | Forward      | GTGGTGATCTGTGGCTTT     |
|         | Reverse      | TATCCAAGAGGCTACAAGTG   |
| Cdh11   | Forward      | ACTATGGACACTCTATCTGTAG |
|         | Reverse      | CAAGAATCAGCAGTAACAAG   |
| Tgfb1   | Forward      | ATGGACTGCTTGGTTCAC     |
|         | Reverse      | ATCTGGCGGTCGTATCTT     |
| Tpm1    | M/AS forward | AGAGCCTCGGAGTATTTGTC   |
|         | AS reverse   | CGCCGCCAAGCTGGAAGATG   |
|         | M reverse    | GAGCAAGCAGCTGGAAGATG   |
| Actn1   | M/AS forward | CCGTCTTCTTCCGGTCAAAG   |
|         | AS reverse   | CGGAGTGATCCCGGTCAAAG   |
|         | M reverse    | AGCCAGGAACAGATGAACGA   |
| Ppfibp1 | M/AS forward | CTCGATCGAGACATTGAAGT   |
|         | AS reverse   | AAAGAGAAAAACATTGAAGT   |
|         | M reverse    | TTTTCTCGTTTGCTGCCAT    |

The boundary-spanning primer of the alternative exon was designed according to the 'model exon' to detect model splicing or according to the 'altered exon' to detect altered splicing. M, model splicing; AS, altered splicing; Pum2, pumilio RNA-binding family member 2; Adm, adrenomedullin; Plpp3, phospholipid phosphatase 3; Itga8, integrin subunit  $\alpha$  8; Itga11, integrin subunit  $\alpha$  11; Ndr4, NDRG family member 4; Rgs2, regulator of G protein signaling 2; Cdh11, cadherin 11; Tgfb1, transforming growth factor  $\beta$ -induced; Tpm1, tropomyosin 1; Actn1, actinin  $\alpha$  1; Ppfibp1, PPFIA binding protein 1.

Table SII. Classification of all regulated alternative splicing events between siPUM2 and NC samples.

| Sample       | siPUM2 vs. NC | siPUM2 vs. NC |
|--------------|---------------|---------------|
| Type         | Up            | Down          |
| 3pMXE        | 3             | 3             |
| 5pMXE        | 5             | 7             |
| A3SS         | 59            | 70            |
| A3SS&ES      | 5             | 9             |
| A5SS         | 50            | 50            |
| A5SS&ES      | 4             | 3             |
| ES           | 15            | 26            |
| IntronR      | 101           | 82            |
| MXE          | 4             | 3             |
| cassetteExon | 17            | 14            |
| Total        | 263           | 267           |

si, small interfering RNA; PUM2, pumilio RNA-binding family member 2; NC, negative control; MXE, mutually exclusive exons; 3pMXE, mutually exclusive 3'UTRs; 5pMXE, mutually exclusive 5'UTRs; A3SS, alternative 3' splice sites; ES, exon skipping; A5SS, alternative 5' splice sites; intronR, intron retention.
